# Supplementary material for: High-throughput identification of gut microbiome-dependent metabolites
Source: Springer Nature journal article supplement (doi:10.1038/s41596-024-00980-6), 2024-05-13
Supplement: MOESM1 [file 41596_2024_980_MOESM1_ESM8.pdf]

# High-throughput identification of gut microbiome-dependent metabolites

In the format provided by the  
authors and unedited

### Supplementary Table 1

Title: Bacterial metabolites

Table columns:

|                   |                                                                              |
|-------------------|------------------------------------------------------------------------------|
| Compound          | metabolite names, with co-eluting metabolites separated by commas            |
| PubChem_CID       | unique chemical identifiers, with co-eluting metabolites separated by commas |
| Molecular_formula | molecular formula for the metabolite                                         |

### Supplementary Table 2

Title: Co-eluting metabolites

Table columns:

|                           |                                                                          |
|---------------------------|--------------------------------------------------------------------------|
| Precursor_ion_ <i>m/z</i> | precursor ion <i>m/z</i> that is used to group co-eluting metabolites    |
| RT                        | retention time (in minutes) that is used to group co-eluting metabolites |
| PubChem_CID               | unique chemical identifiers (e.g., unique to structural isomers)         |
| Compound                  | metabolite names                                                         |

Worksheets:

|               |                                                      |
|---------------|------------------------------------------------------|
| C18positive   | metabolites detected using the C18 positive method   |
| C18negative   | metabolites detected using the C18 negative method   |
| HILICpositive | metabolites detected using the HILIC positive method |
