# Supplementary material for: High-throughput identification of gut microbiome-dependent metabolites
Source: Springer Nature journal article supplement (doi:10.1038/s41596-024-00980-6), 2024-05-13
Supplement: MOESM3 [file 41596_2024_980_MOESM3_ESM10.xlsx]

## Sheet: Sheet1
Compound	PubChem_CID	Molecular_formula_as_seen_in_ms
1-AMINOCYCLOPROPANE-1-CARBOXYLIC ACID	535	C4H7NO2
1-METHYL-HYDANTOIN	69217	C4H6N2O2
1-METHYLADENOSINE	27476	C11H15N5O4
2'-DEOXYGUANOSINE 5'-MONOPHOSPHATE	135398597	C10H14N5O7P
2'-DEOXYGUANOSINE 5'-MONOPHOSPHATE, ADENOSINE 5'-MONOPHOSPHATE	6083, 135398597	C10H14N5O7P
2,4-DIHYDROXYBUTANOIC ACID	192742	C4H8O4
2,6-DIAMINOHEPTANEDIOIC ACID	439283	C7H14N2O4
2-(4-HYDROXYPHENYL)PROPIONIC ACID	102526	C9H10O3
2-AMINO-2-METHYLPROPANOIC ACID, 2-AMINOBUTYRIC ACID, 3-AMINOISOBUTANOIC ACID, ALPHA-AMINOBUTYRIC ACID	6119, 64956, 439691, 6657	C4H9NO2
2-AMINO-2-METHYLPROPANOIC ACID, 2-AMINOBUTYRIC ACID, 3-AMINOISOBUTANOIC ACID, ALPHA-AMINOBUTYRIC ACID, N,N-DIMETHYLGLYCINE	64956, 6657, 6119, 439691, 673	C4H9NO2
2-AMINOBENZOIC ACID	227	C7H7NO2
2-AMINOPHENOL	5801	C6H7NO
2-DEOXY-GLUCOSE	439268	C6H12O5
2-ETHYL-3-HYDROXY-4H-PYRAN-4-ONE	21059	C7H8O3
2-HYDROXY-3-METHYLPENTANOIC ACID, 2-HYDROXY-4-METHYLPENTANOIC ACID	83697, 10796774, 92779	C6H12O3
2-HYDROXY-4-(METHYLTHIO)BUTYRIC ACID	11427	C5H10O3S
2-HYDROXYBUTYRIC ACID, 3-HYDROXYBUTYRIC ACID, 3-HYDROXYISOBUTYRIC ACID	440864, 92135, 441, 11217234	C4H8O3
2-HYDROXYPHENYLACETIC ACID	11970	C8H8O3
2-ISOPROPYLMALIC ACID	5280523	C7H12O5
2-METHYLBUTYRYLGLYCINE	193872	C7H13NO3
2-METHYLMALEIC ACID, ITACONIC ACID	811, 643798	C5H6O4
2-PHENYLBUTYRIC ACID	7012	C10H12O2
2-PHOSPHOGLYCERIC ACID	59	C3H7O7P
3'-CMP	66535	C9H14N3O8P
3,4-DIHYDROXYPHENYLACETIC ACID, 3-HYDROXYMANDELIC ACID, 4-HYDROXYMANDELIC ACID, VANILLIC ACID	8468, 547, 328, 86957	C8H8O4
3,5-DIMETHOXYPHENOL	10383	C5H8O4
3-(4-HYDROXYPHENYL)PYRUVIC ACID	979	C9H8O4
3-AMINOSALICYLIC ACID	68443	C7H7NO3
3-DEHYDROSHIKIMIC ACID	439774	C7H8O5
3-FUROIC ACID	10268	C5H4O3
3-HYDROXYGLUTARIC ACID	181976	C5H8O5
3-HYDROXYGLUTARIC ACID, ALPHA-HYDROXYGLUTARIC ACID, CITRAMALIC ACID	181976, 439939, 1081	C5H8O5
3-PHENYLLACTIC ACID	643327, 444718	C9H10O3
3-PHOSPHOGLYCERIC ACID	724	C3H7O7P
3-SULFINO-ALANINE	1549098	C3H7NO4S
3-SULFOOXYBENZOIC ACID, 4-SULFOOXYBENZOIC ACID	21126437, 18690341	C7H6O6S
4-ACETAMIDOPHENOL	1983	C8H9NO2
4-AMINOBUTANOIC ACID	119	C4H9NO2
4-ETHYLOCTANOIC ACID	61840	C10H20O2
4-HYDROXYBENZOIC ACID	135	C7H6O3
4-HYDROXYPHENYL ACETIC ACID	127	C8H8O3
4-HYDROXYPROLINE	825, 5810, 440014, 69248	C5H9NO3
4-HYDROXYPROLINE, 5-AMINOLEVULINIC ACID	5810, 69248, 825, 440014, 137	C5H9NO3
4-IMIDAZOLEACETIC ACID	96215	C5H6N2O2
4-METHYL-2-OXO-PENTANOIC ACID	70	C6H10O3
4-METHYLVALERIC ACID	12587	C6H12O2
4-PYRIDOXIC ACID	6723	C8H9NO4
5'-DEOXYADENOSINE	439182	C10H13N5O3
5,6-DIHYDROURACIL	649	C4H6N2O2
5-AMINOIMIDAZOLE-4-CARBOXAMIDE-1-BETA-RIBOFURANOSIDE	17513	C9H14N4O5
5-AMINOIMIDAZOLE-4-CARBOXAMIDE-1-BETA-RIBOFURANOSYL 5'-MONOPHOSPHATE	65110	C9H15N4O8P
5-AMINOPENTANOIC ACID, VALINE	6287, 138	C5H11NO2
5-METHOXY-3-INDOLEACETIC ACID	18986	C11H11NO3
5-PHENYLVALERIC ACID	16757	C11H14O2
6-PHOSPHOGLUCONIC ACID	91493	C6H13O10P
8-HYDROXYQUINOLINE, INDOLE-3-CARBOXALDEHYDE	10256, 1923	C9H7NO
ACONITIC ACID	643757, 444212	C6H6O6
ADENINE	190	C5H5N5
ALANINE, BETA-ALANINE, SARCOSINE	239, 5950, 71080, 1088	C3H7NO2
ALANINE, SARCOSINE	5950, 71080, 1088	C3H7NO2
ALLO-ISOLEUCINE, ISOLEUCINE	99288, 6306	C6H13NO2
ALLOTHREONINE, HOMOSERINE	99289, 12647	C4H9NO3
ALLOTHREONINE, HOMOSERINE, THREONINE	99289, 6288, 12647	C4H9NO3
ALPHA-AMINOADIPIC ACID	92136	C6H11NO4
ALPHA-GALACTOSE 1-PHOSPHATE, ALPHA-GLUCOSE 1-PHOSPHATE, GLUCOSE-6-PHOSPHATE, MANNOSE 6-PHOSPHATE	123912, 439958, 65533, 65127	C6H13O9P
ALPHA-GALACTOSE 1-PHOSPHATE, MANNOSE 6-PHOSPHATE	123912, 65127	C6H13O9P
ALPHA-KETOGLUTARIC ACID	51	C5H6O5
ALPHA-N-ACETYL-GLUTAMINE	25561	C7H12N2O4
AMINO(4-HYDROXYCYCLOHEXYL)ACETIC ACID	4250253	C8H15NO3
ASCORBIC ACID, GLUCURONOLACTONE	92283, 54670067	C6H8O6
ASPARTIC ACID	83887, 5960	C4H7NO4
BILIVERDIN	5280353	C33H34N4O6
CADAVERINE	273	C5H14N2
CAPRYLOYL GLYCINE	84290	C10H19NO3
CHLOROGENIC ACID	1794427	C16H18O9
CHOLINE	305	C5H14NO+
CINNAMIC ACID	5372954, 444539	C9H8O2
CITRIC ACID, ISOCITRIC ACID	311, 1198	C6H8O7
CITRULLINE	9750	C6H13N3O3
COPROPORPHYRIN III	114935	C36H38N4O8
CYSTEINE	5862	C3H7NO2S
CYSTINE	67678	C6H12N2O4S2
CYTIDINE	6175	C9H13N3O5
CYTIDINE 5'-DIPHOSPHATE	6132	C9H15N3O11P2
CYTIDINE 5'-DIPHOSPHOCHOLINE	13804	C14H26N4O11P2
CYTOSINE	597	C4H5N3O
DAMP	12599	C10H14N5O6P
DECANOIC ACID	2969	C10H20O2
DEOXYCARNITINE	725	C7H15NO2
DEOXYURIDINE	13712	C9H12N2O5
DETHIOBIOTIN	445027	C10H18N2O3
DIACETYL	650	C4H6O2
DIMETHYLBENZIMIDAZOLE	675	C9H10N2
ELAIDIC ACID, OLEIC ACID, PETROSELINIC ACID	445639, 637517, 5281125	C18H34O2
ERYTHRITOL, THREITOL	222285, 169019	C4H10O4
ETHANOLAMINE PHOSPHATE	1015	C2H8NO4P
FLAVIN ADENINE DINUCLEOTIDE	643975	C27H33N9O15P2
FRUCTOSE 1,6-BIPHOSPHATE	172313	C6H14O12P2
FRUCTOSE 6-PHOSPHATE, GLUCOSE-6-PHOSPHATE	439958, 69507	C6H13O9P
FUMARIC ACID	444972	C4H4O4
FUMARIC ACID, MALEIC ACID	444266, 444972	C4H4O4
GALACTITOL, MANNITOL	11850, 6251	C6H14O6
GALLIC ACID	370	C7H6O5
GLUCOSAMINE 6-SULFATE	72361	C6H13NO8S
GLUCOSE-6-PHOSPHATE	439958	C6H13O9P
GLUTAMIC ACID	33032	C5H9NO4
GLUTAMIC ACID, N-METHYL-ASPARTIC ACID	22880, 33032	C5H9NO4
GLUTAMINE	5961	C5H10N2O3
GLYCINE	750	C2H5NO2
GUANOSINE	135398635	C10H13N5O5
GUANOSINE 5'-MONOPHOSPHATE	135398631	C10H14N5O8P
HISTAMINE	774	C5H9N3
HISTIDINOL	165271	C6H11N3O
HOMOCITRULLINE	65072	C7H15N3O3
HOMOVANILLIC ACID	1738	C9H10O4
HYDROXYPHENYLLACTIC ACID	9378	C9H10O4
HYPOXANTHINE	790	C5H4N4O
INDOLE	798	C8H7N
INDOLE-3-ETHANOL	10685	C10H11NO
INDOLEACETIC ACID	802	C10H9NO2
INDOLEACRYLIC ACID	5355219	C11H9NO2
INDOLELACTIC ACID	92904	C11H11NO3
INDOLEPROPIONIC ACID	3744	C11H11NO2
INOSINE	135398641	C10H12N4O5
ISOVALERYLGLYCINE	546304	C7H13NO3
LACTIC ACID	61503, 107689	C3H6O3
LAUROYLCARNITINE	168381	C19H37NO4
LEVULINIC ACID	11579	C5H8O3
LINOLEIC ACID	5280450	C18H32O2
LINOLENIC ACID	5280934	C18H30O2
LUMICHROME	5326566	C12H10N4O2
LYSINE	5962	C6H14N2O2
MALIC ACID	525, 222656, 92824	C4H6O5
MALONIC ACID	867	C3H4O4
MELATONIN	896	C13H16N2O2
METHYLMALONIC ACID	487	C4H6O4
METHYLMALONIC ACID, SUCCINIC ACID	1110, 487	C4H6O4
METHYLSUCCINIC ACID	10349	C5H8O4
N,N-DIMETHYLGLYCINE	673	C4H9NO2
N-(3-PHENYLPROPIONYL)GLYCINE	152323	C11H13NO3
N-ACETYL-ALANINE	88064	C5H9NO3
N-ACETYL-ASPARTIC ACID	65065	C6H9NO5
N-ACETYL-GALACTOSAMINE, N-ACETYL-GLUCOSAMINE, N-ACETYL-MANNOSAMINE	439281, 84265, 439174	C8H15NO6
N-ACETYL-GLUTAMIC ACID	185	C7H11NO5
N-ACETYL-LEUCINE	70912	C8H15NO3
N-ACETYL-METHIONINE	6180	C7H13NO3S
N-ACETYL-PHENYLALANINE	74839	C11H13NO3
N-ACETYL-SERINE	352294	C5H9NO4
N-ACETYL-TYROSINE	68310	C11H13NO4
N-ACETYLGLYCINE	10972	C4H7NO3
N-ACETYLNEURAMINATE	439197	C11H19NO9
N-ACETYLPUTRESCINE	122356	C6H14N2O
N-ACETYLTRYPTOPHAN	439917, 2002	C13H14N2O3
N-ALPHA-ACETYL-ASPARAGINE	99715	C6H10N2O4
N-ALPHA-ACETYL-LYSINE	192590	C8H16N2O3
N-BUTYRYLGLYCINE	88412	C6H11NO3
N-FORMYL-METHIONINE	6995182	C6H11NO3S
N6-(DELTA2-ISOPENTENYL)-ADENINE	92180	C10H13N5
NAD	5893	C21H28N7O14P2+
NICOTINAMIDE	936	C6H6N2O
NICOTINIC ACID, PICOLINIC ACID	1018, 938	C6H5NO2
O-PHOSPHO-SERINE	106, 68841	C3H8NO6P
O-SUCCINYL-HOMOSERINE	439406	C8H13NO6
ORNITHINE	71082, 6262	C5H12N2O2
OROTIC ACID	967	C5H4N2O4
P-COUMARIC ACID	637542	C9H8O3
PALMITIC ACID	985	C16H32O2
PANTOTHENIC ACID	988, 6613	C9H17NO5
PENTANEDECANOIC ACID	13849	C15H30O2
PETROSELINIC ACID	5281125	C18H34O2
PHENYLACETIC ACID	999	C8H8O2
PHENYLACETYLGLYCINE	68144	C10H11NO3
PHENYLALANINE	6140	C9H11NO2
PHENYLETHANOLAMINE	1000	C8H11NO
PHOSPHO(ENOL)PYRUVIC ACID	1005	C3H5O6P
PHOSPHOCHOLINE	1014	C5H15NO4P+
PROLINE	8988, 145742	C5H9NO2
PROPIONYLCARNITINE	107738	C10H19NO4
PROPIONYLGLYCINE	98681	C5H9NO3
PURINE	1044	C5H4N4
PUTRESCINE	1045	C4H12N2
PYRIDOXAMINE	1052	C8H12N2O2
PYRIDOXINE	1054	C8H11NO3
PYROGALLOL	1057	C6H6O3
PYROGLUTAMIC ACID	439685, 499, 7405	C5H7NO3
RAC-GLYCEROL 1-MYRISTATE	79050	C17H34O4
RIBOFLAVIN	493570	C17H20N4O6
RIBOSE 5-PHOSPHATE	439167	C5H11O8P
S-(5'-ADENOSYL)-L-HOMOCYSTEINE	439155	C14H20N6O5S
SPERMIDINE	1102	C7H19N3
SPHINGANINE	91486	C18H39NO2
SUCCINIC ACID	1110	C4H6O4
THYMIDINE 5'-MONOPHOSPHATE	9700	C10H15N2O8P
THYMINE	1135	C5H6N2O2
TIGLYL GLYCINE	6441567	C7H11NO3
TRICARBALLYLIC ACID	14925	C6H8O6
TRYPTAMINE	1150	C10H12N2
TRYPTOPHAN	6305	C11H12N2O2
TRYPTOPHAN ETHYL ESTER	81996	C13H16N2O2
TYRAMINE	5610	C8H11NO
TYROSINE	6057	C9H11NO3
URACIL	1174	C4H4N2O2
URIDINE	6029	C9H12N2O6
URIDINE 5'-DIPHOSPHATE	6031	C9H14N2O12P2
URIDINE 5'-TRIPHOSPHATE	6133	C9H15N2O15P3
URIDINE-5-MONOPHOSPHATE	6030	C9H13N2O9P
UROCANIC ACID	736715	C6H6N2O2
VALINE	6287	C5H11NO2
VANILLIC ACID	8468	C8H8O4
VITAMIN D3	10883523	C27H44O
VITAMIN K4	11310	C15H14O4
XANTHINE	1188	C5H4N4O2
XANTHOSINE	64959	C10H12N4O6
XANTHOSINE 5'-MONOPHOSPHATE	73323	C10H13N4O9P
XANTHURENIC ACID	5699	C10H7NO4
