# Supplementary material for: High-throughput identification of gut microbiome-dependent metabolites
Source: Springer Nature journal article supplement (doi:10.1038/s41596-024-00980-6), 2024-05-13
Supplement: MOESM4 [file 41596_2024_980_MOESM4_ESM11.xlsx]

## Sheet: C18positive
Precursor_ion_m/z	RT	PubChem_CID	Compound
90.055	0.72	239	BETA-ALANINE
		1088	SARCOSINE
		5950	ALANINE
		71080	ALANINE
104.071	0.793	6119	2-AMINO-2-METHYLPROPANOIC ACID
		6657	2-AMINOBUTYRIC ACID
		64956	3-AMINOISOBUTANOIC ACID
		439691	ALPHA-AMINOBUTYRIC ACID
105.055	0.772	441	3-HYDROXYBUTYRIC ACID
		92135	3-HYDROXYBUTYRIC ACID
105.055	4.02	11671	ALPHA-HYDROXYISOBUTYRIC ACID
		440864	2-HYDROXYBUTYRIC ACID
116.071	0.811	8988	PROLINE
		145742	PROLINE
118.086	0.854	138	5-AMINOPENTANOIC ACID
		6287	VALINE
120.066	0.732	6288	THREONINE
		12647	HOMOSERINE
		99289	ALLOTHREONINE
123.065	0.775	169019	THREITOL
		222285	ERYTHRITOL
124.039	1.13	938	NICOTINIC ACID
		1018	PICOLINIC ACID
130.05	1.422	499	PYROGLUTAMIC ACID
		7405	PYROGLUTAMIC ACID
		439685	PYROGLUTAMIC ACID
131.07	1.721	10428	MEVALOLACTONE
		5325923	MEVALONOLACTONE
132.066	0.733	137	5-AMINOLEVULINIC ACID
		825	4-HYDROXYPROLINE
		5810	4-HYDROXYPROLINE
		69248	4-HYDROXYPROLINE
		440014	4-HYDROXYPROLINE
132.102	1.594	6306	ISOLEUCINE
		99288	ALLO-ISOLEUCINE
132.102	1.666	857	LEUCINE
		6106	LEUCINE
		21236	NORLEUCINE
133.086	3.649	83697	2-HYDROXY-4-METHYLPENTANOIC ACID
		92779	2-HYDROXY-4-METHYLPENTANOIC ACID
133.097	0.653	6262	ORNITHINE
		71082	ORNITHINE
134.045	0.726	5960	ASPARTIC ACID
		83887	ASPARTIC ACID
135.029	1.657	92824	MALIC ACID
		222656	MALIC ACID
148.06	0.745	22880	N-METHYL-ASPARTIC ACID
		33032	GLUTAMIC ACID
153.076	0.766	827	ARABITOL
		6912	XYLITOL
		439255	ARABITOL
154.086	0.857	681	DOPAMINE
		440266	OCTOPAMINE
161.081	3.235	385	PIMELIC ACID
		12292	3-METHYLADIPIC ACID
162.076	0.814	469	AMINOADIPIC ACID
		92136	ALPHA-AMINOADIPIC ACID
163.108	0.649	1029	5-HYDROXYLYSINE
		3032849	5-HYDROXYLYSINE
165.076	0.75	25310	ALPHA-RHAMNOSE
		3034656	FUCOSE
167.07	3.823	444718	3-PHENYLLACTIC ACID
		643327	3-PHENYLLACTIC ACID
179.055	0.772	7027	GLUCONO-1,5-LACTONE
		439373	GULONIC ACID GAMMA-LACTONE
180.087	0.676	24154	GALACTOSAMINE
		439213	GLUCOSAMINE
		440049	MANNOSAMINE
181.071	0.74	892	MYO-INOSITOL
		18950	MANNOSE
		439192	SORBOSE
		2723872	FRUCTOSE
		10130220	GULOSE
181.071	4.29	5793	GLUCOSE
		6036	GALACTOSE
		79025	ALPHA-GLUCOSE
		439312	TAGATOSE
		439507	ALLOSE
183.086	0.756	6251	MANNITOL
		11850	GALACTITOL
184.097	0.839	1237	NORMETANEPHRINE
		5816	EPINEPHRINE
185.042	1.678	1662	3-HYDROXY-3-METHYLGLUTARIC ACID
		193530	2-HYDROXYHEXANEDIOIC ACID
220.118	2.37	988	PANTOTHENIC ACID
		6613	PANTOTHENIC ACID
222.097	0.823	84265	N-ACETYL-GALACTOSAMINE
		439174	N-ACETYL-GLUCOSAMINE
		439281	N-ACETYL-MANNOSAMINE
247.108	3.7425	2002	N-ACETYLTRYPTOPHAN
		439917	N-ACETYLTRYPTOPHAN
261.037	0.783	65127	MANNOSE 6-PHOSPHATE
		65533	ALPHA-GLUCOSE 1-PHOSPHATE
		123912	ALPHA-GALACTOSE 1-PHOSPHATE
		439958	GLUCOSE-6-PHOSPHATE
269.062	2.795	10010	HOMOCYSTINE
		439579	HOMOCYSTINE
283.263	5.729	445639	OLEIC ACID
		637517	ELAIDIC ACID
		5281125	PETROSELINIC ACID
343.123	0.767	5988	SUCROSE
		6134	BETA-LACTOSE
		11333	LACTULOSE
		439186	MALTOSE
		440658	MELIBIOSE
347.222	5.111	5753	CORTICOSTERONE
		440707	REICHSTEIN'S SUBSTANCE S
450.321	5.541	12544	GLYCOCHENODEOXYCHOLIC ACID
		3035026	GLYCODEOXYCHOLIC ACID
505.176	0.818	10542	RAFFINOSE
		439586	MALTOTRIOSE

## Sheet: C18negative
Precursor_ion_m/z	RT	PubChem_CID	Compound
88.0404	0.782	1088	SARCOSINE
		5950	ALANINE
		71080	ALANINE
89.0244	0.786	61503	LACTIC ACID
		107689	LACTIC ACID
102.056	0.839	673	N,N-DIMETHYLGLYCINE
		6119	2-AMINO-2-METHYLPROPANOIC ACID
		6657	2-AMINOBUTYRIC ACID
		64956	3-AMINOISOBUTANOIC ACID
		439691	ALPHA-AMINOBUTYRIC ACID
103.04	0.86	441	3-HYDROXYBUTYRIC ACID
		92135	3-HYDROXYBUTYRIC ACID
		440864	2-HYDROXYBUTYRIC ACID
		11217234	3-HYDROXYISOBUTYRIC ACID
114.056	0.877	8988	PROLINE
		145742	PROLINE
115.004	0.731	444266	MALEIC ACID
		444972	FUMARIC ACID
117.019	0.731	487	METHYLMALONIC ACID
		1110	SUCCINIC ACID
117.056	0.882	95433	2-HYDROXY-2-METHYLBUTYRIC ACID
		188979	2-(HYDROXYMETHYL)BUTANOIC ACID
118.051	0.812	6288	THREONINE
		12647	HOMOSERINE
		99289	ALLOTHREONINE
121.051	0.852	169019	THREITOL
		222285	ERYTHRITOL
122.025	1.295	938	NICOTINIC ACID
		1018	PICOLINIC ACID
128.035	0.849	499	PYROGLUTAMIC ACID
		7405	PYROGLUTAMIC ACID
		439685	PYROGLUTAMIC ACID
129.019	0.748	811	ITACONIC ACID
		643798	2-METHYLMALEIC ACID
130.051	0.813	137	5-AMINOLEVULINIC ACID
		825	4-HYDROXYPROLINE
		5810	4-HYDROXYPROLINE
		69248	4-HYDROXYPROLINE
		440014	4-HYDROXYPROLINE
130.087	1.452	6306	ISOLEUCINE
		99288	ALLO-ISOLEUCINE
130.087	1.586	857	LEUCINE
		6106	LEUCINE
		21236	NORLEUCINE
131.035	0.734	743	GLUTARIC ACID
		10349	METHYLSUCCINIC ACID
		11756	ETHYLMALONIC ACID
131.046	0.79	111	3-UREIDOPROPIONATE
		6267	ASPARAGINE
		11163	GLYCYL-GLYCINE
131.071	1.926	83697	2-HYDROXY-4-METHYLPENTANOIC ACID
		92779	2-HYDROXY-4-METHYLPENTANOIC ACID
		10796774	2-HYDROXY-3-METHYLPENTANOIC ACID
131.083	0.844	6262	ORNITHINE
		71082	ORNITHINE
132.03	0.757	5960	ASPARTIC ACID
		83887	ASPARTIC ACID
133.014	0.722	525	MALIC ACID
		92824	MALIC ACID
		222656	MALIC ACID
136.04	0.875	978	4-AMINOBENZOIC ACID
		5570	TRIGONELLINE
144.045	4.039	1923	8-HYDROXYQUINOLINE
		10256	INDOLE-3-CARBOXALDEHYDE
145.051	0.74	196	ADIPIC ACID
		12046	2-METHYLGLUTARIC ACID
		12284	3-METHYLGLUTARIC ACID
		73917	MONO-METHYL GLUTARATE
147.03	0.728	1081	CITRAMALIC ACID
		181976	3-HYDROXYGLUTARIC ACID
		439939	ALPHA-HYDROXYGLUTARIC ACID
147.045	3.249	444539	CINNAMIC ACID
		5372954	CINNAMIC ACID
149.009	0.737	439655	TARTARIC ACID
		444305	TARTARIC ACID
149.046	0.852	229	ARABINOSE
		5779	RIBOSE
		66308	ARABINOSE
		135191	XYLOSE
		439195	ARABINOSE
		439240	LYXOSE
		10975657	RIBOSE
151.04	1.46	127	4-HYDROXYPHENYL ACETIC ACID
		11914	MANDELIC ACID
		439616	MANDELIC ACID
151.061	0.839	827	ARABITOL
		6912	XYLITOL
		439255	ARABITOL
152.035	0.853	65083	3-AMINO-4-HYDROXYBENZOIC ACID
		127115	3-AMINO-5-HYDROXYBENZOIC ACID
153.019	0.867	72	3,4-DIHYDROXYBENZOATE
		7424	3,5-DIHYDROXYBENZOIC ACID
153.019	1.599	19	2,3-DIHYDROXYBENZOIC ACID
		3469	2,5-DIHYDROXYBENZOIC ACID
159.066	0.764	385	PIMELIC ACID
		12292	3-METHYLADIPIC ACID
160.062	0.761	469	AMINOADIPIC ACID
		92136	ALPHA-AMINOADIPIC ACID
		439377	N-METHYL-GLUTAMATE
161.046	0.733	1662	3-HYDROXY-3-METHYLGLUTARIC ACID
		193530	2-HYDROXYHEXANEDIOIC ACID
161.093	0.832	1029	5-HYDROXYLYSINE
		3032849	5-HYDROXYLYSINE
163.061	0.876	25310	ALPHA-RHAMNOSE
		3034656	FUCOSE
165.056	1.922	10726	TROPIC ACID
		102526	2-(4-HYDROXYPHENYL)PROPIONIC ACID
165.056	2.424	444718	3-PHENYLLACTIC ACID
		643327	3-PHENYLLACTIC ACID
167.035	0.878	328	4-HYDROXYMANDELIC ACID
		547	3,4-DIHYDROXYPHENYLACETIC ACID
		8468	VANILLIC ACID
		86957	3-HYDROXYMANDELIC ACID
173.009	0.702	444212	ACONITIC ACID
		643757	ACONITIC ACID
175.025	0.781	92283	GLUCURONOLACTONE
		54670067	ASCORBIC ACID
179.035	0.914	689043	CIS-CAFFEIC ACID
		1549111	TRANS-CAFFEIC ACID
179.056	0.846	892	MYO-INOSITOL
		5793	GLUCOSE
		6036	GALACTOSE
		6904	SORBOSE
		18950	MANNOSE
		79025	ALPHA-GLUCOSE
		439192	SORBOSE
		439312	TAGATOSE
		439507	ALLOSE
		441036	PSICOSE
		2723872	FRUCTOSE
		10130220	GULOSE
181.072	0.822	6251	MANNITOL
		11850	GALACTITOL
184.002	0.727	106	O-PHOSPHO-SERINE
		68841	O-PHOSPHO-SERINE
191.02	0.702	311	CITRIC ACID
		1198	ISOCITRIC ACID
193.035	0.761	157	5-KETO-GLUCONIC ACID
		94715	GLUCURONIC ACID
		444791	GLUCURONIC ACID
197.046	0.892	1245	4-HYDROXY-3-METHOXYMANDELIC ACID
		736172	3-METHOXY-4-HYDROXYMANDELIC ACID
209.03	0.73	33037	SACCHARIC ACID
		3037582	GALACTARIC ACID
216.981	0.857	18690341	4-SULFOOXYBENZOIC ACID
		21126437	3-SULFOOXYBENZOIC ACID
220.083	0.889	84265	N-ACETYL-GALACTOSAMINE
		439174	N-ACETYL-GLUCOSAMINE
		439281	N-ACETYL-MANNOSAMINE
245.093	2.981	2002	N-ACETYLTRYPTOPHAN
		439917	N-ACETYLTRYPTOPHAN
259.022	0.727	69507	FRUCTOSE 6-PHOSPHATE
		439958	GLUCOSE-6-PHOSPHATE
259.022	0.744	65127	MANNOSE 6-PHOSPHATE
		123912	ALPHA-GALACTOSE 1-PHOSPHATE
341.109	0.878	5988	SUCROSE
		6255	MALTOSE
		10712	CELLOBIOSE
		11333	LACTULOSE
		439178	CELLOBIOSE
		439186	MALTOSE
		439559	PALATINOSE
		440658	MELIBIOSE
		5460935	TURANOSE
346.056	0.881	6083	ADENOSINE 5'-MONOPHOSPHATE
		135398597	2'-DEOXYGUANOSINE 5'-MONOPHOSPHATE
391.285	5.581	10133	CHENODEOXYCHOLIC ACID
		222528	DEOXYCHOLIC ACID
503.162	0.879	10542	RAFFINOSE
		439586	MALTOTRIOSE
505.988	0.771	5957	ADENOSINE 5'-TRIPHOSPHATE
		135398599	2'-DEOXYGUANOSINE 5'-TRIPHOSPHATE
565.048	0.764	8629	URIDINE 5'-DIPHOSPHOGLUCOSE
		18068	URIDINE 5'-DIPHOSPHOGALACTOSE
		53477679	URIDINE 5'-DIPHOSPHOGLUCOSE
606.074	0.789	445675	URIDINE 5'-DIPHOSPHO-N-ACETYLGLUCOSAMINE
		6419712	URIDINE 5'-DIPHOSPHO-N-ACETYLGALACTOSAMINE

## Sheet: HILICpositive
Precursor_ion_m/z	RT	PubChem_CID	Compound
90.055	7.643	239	BETA-ALANINE
		1088	SARCOSINE
116.071	7.486	8988	PROLINE
		145742	PROLINE
120.066	8.023	12647	HOMOSERINE
		99289	ALLOTHREONINE
130.05	7.439	499	PYROGLUTAMIC ACID
		7405	PYROGLUTAMIC ACID
		439685	PYROGLUTAMIC ACID
132.066	7.799	825	4-HYDROXYPROLINE
		5810	4-HYDROXYPROLINE
		69248	4-HYDROXYPROLINE
		440014	4-HYDROXYPROLINE
132.102	6.7565	857	LEUCINE
		6106	LEUCINE
		21236	NORLEUCINE
132.102	6.868	6306	ISOLEUCINE
		99288	ALLO-ISOLEUCINE
133.097	9.333	6262	ORNITHINE
		71082	ORNITHINE
134.045	8.798	5960	ASPARTIC ACID
		83887	ASPARTIC ACID
136.076	1.20867	7680	2-PHENYLACETAMIDE
		80654	N-BENZYLFORMAMIDE
139.039	1.085	338	SALICYLIC ACID
		7420	3-HYDROXYBENZOIC ACID
153.055	1.144	1183	VANILLIN
		6738	3-METHYLSALICYLIC ACID
		6990	2',4'-DIHYDROXYACETOPHENONE
154.05	1.452	86	3-HYDROXYANTHRANILIC ACID
		66644	SALICYLHYDROXAMIC ACID
162.076	8.044	469	AMINOADIPIC ACID
		92136	ALPHA-AMINOADIPIC ACID
165.076	1.576	17106	6-DEOXY-GALACTOSE
		439268	2-DEOXY-GLUCOSE
167.07	1.12	10394	3-(4-HYDROXYPHENYL)PROPIONIC ACID
		518900	METHYL 4-HYDROXYPHENYLACETATE
169.05	1.433	8468	VANILLIC ACID
		75787	5-METHOXYSALICYLIC ACID
190.086	1.069	3744	INDOLEPROPIONIC ACID
		74706	METHYL INDOLE-3-ACETATE
258.11	8.269	71920	SN-GLYCERO-3-PHOSPHOCHOLINE
		657272	SN-GLYCERO-3-PHOSPHOCHOLINE
347.222	1.213	5753	CORTICOSTERONE
		440707	REICHSTEIN'S SUBSTANCE S
360.15	8.134	5988	SUCROSE
		5460935	TURANOSE
608.089	9.712	445675	URIDINE 5'-DIPHOSPHO-N-ACETYLGLUCOSAMINE
		6419712	URIDINE 5'-DIPHOSPHO-N-ACETYLGALACTOSAMINE
